# Supplementary material
Source: PubMed Central journal article supplement (PMC3718279)
Supplement: NIHMS438330-supplement-Fig__S1.pdf [file NIHMS438330-supplement-Fig__S1.pdf]

## Figure

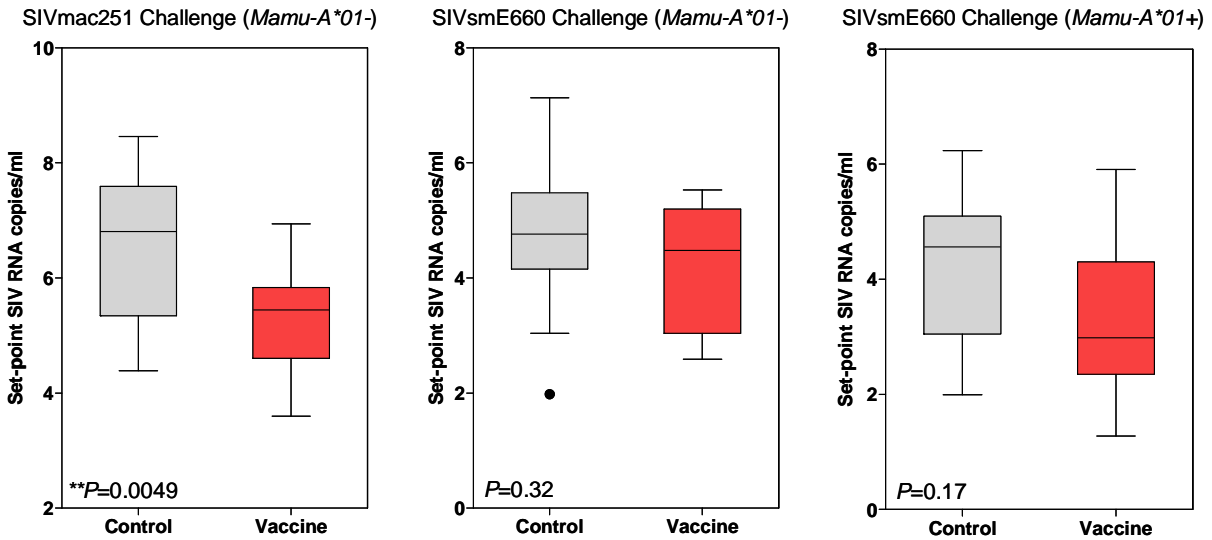

**Figure S1. Set-point plasma virus RNA levels following infection after repeated intrarectal challenge.** Set-point plasma virus RNA levels were assessed on day 56 following peak viremia. Results of three parallel studies as described in the legend of Fig.1 are shown. The differences between 2 groups of monkeys in set-point plasma virus RNA levels were analyzed by the nonparametric Mann-Whitney test.
