# Supplementary material
Source: PubMed Central journal article supplement (PMC3718279)
Supplement: NIHMS438330-supplement-Fig__S2.pdf [file NIHMS438330-supplement-Fig__S2.pdf]

**A. SIVmac251 Challenge (*Mamu-A\*01*-)**

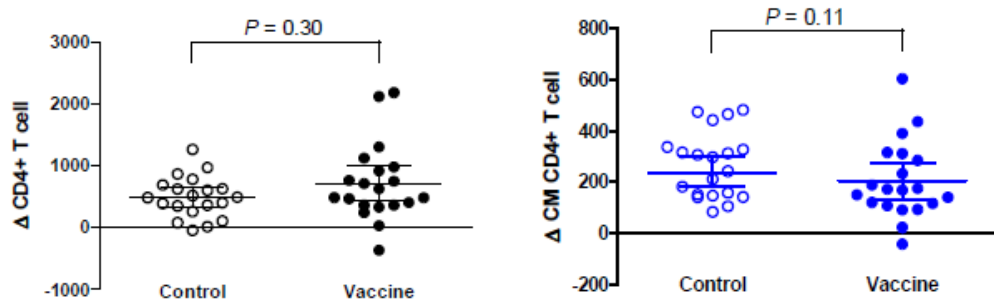

**B. SIVsmE660 Challenge (*Mamu-A\*01*-)**

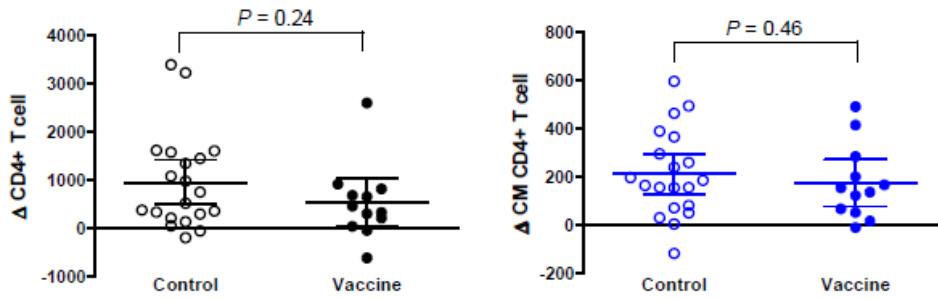

**C. SIVsmE660 Challenge (*Mamu-A\*01*+)**

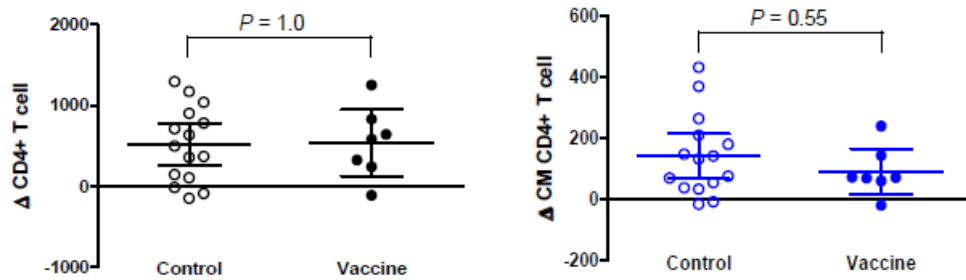

**Figure S2. The loss of total CD4<sup>+</sup> T cells and CM CD4<sup>+</sup> T cells after infection.** The loss of peripheral blood total CD4<sup>+</sup> T cells and CM CD4<sup>+</sup> T cells from pre-infection to day 70 post infection was monitored in the cohorts of rhesus monkeys following SIV infection. Results of three parallel studies are shown: (A) *Mamu-A\*01* negative rhesus monkeys infected with SIVmac251; (B) *Mamu-A\*01* negative rhesus monkeys infected with SIVsmE660; (C) *Mamu-A\*01* positive rhesus monkeys infected with SIVsmE660. The differences between 2 groups of monkeys in the loss of total CD4<sup>+</sup> T cells and CM CD4<sup>+</sup> T cells in each study were analyzed by the nonparametric Mann-Whitney test.
