# Supplementary material
Source: PubMed Central journal article supplement (PMC3718279)
Supplement: NIHMS438330-supplement-Fig__S3.pdf [file NIHMS438330-supplement-Fig__S3.pdf]

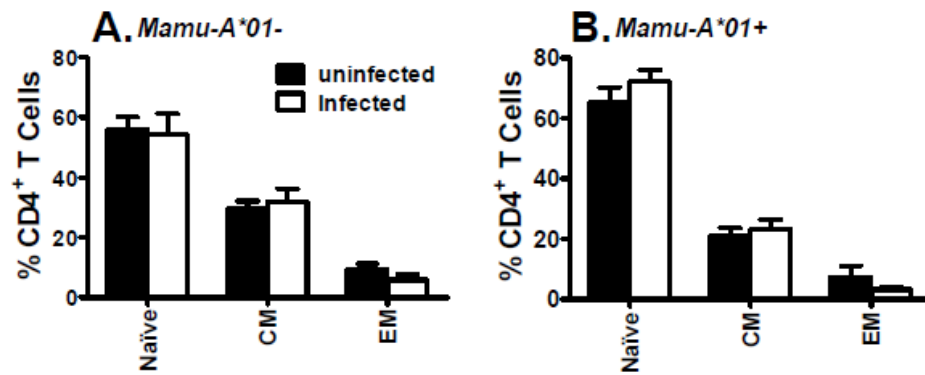

Figure S3. Expression of maturation-associated molecules on CD4<sup>+</sup> T cells. The percentages of CD4<sup>+</sup> T lymphocytes that express CD28<sup>+</sup>CD95<sup>-</sup>(Naïve), CD28<sup>+</sup>CD95<sup>+</sup>(CM), and CD28<sup>-</sup>CD95<sup>+</sup>(EM) are shown for both the *Mamu-A\*01* positive and *Mamu-A\*01* negative cohorts of monkeys prior to SIVsmE660 challenge. No statistically significant differences in the magnitudes of the cell subpopulations were noted as determined by the Mann-Whitney test in those animals that became infected and those that resisted infection.
