# Supplementary material
Source: PubMed Central journal article supplement (PMC3718279)
Supplement: NIHMS438330-supplement-Fig__S4.pdf [file NIHMS438330-supplement-Fig__S4.pdf]

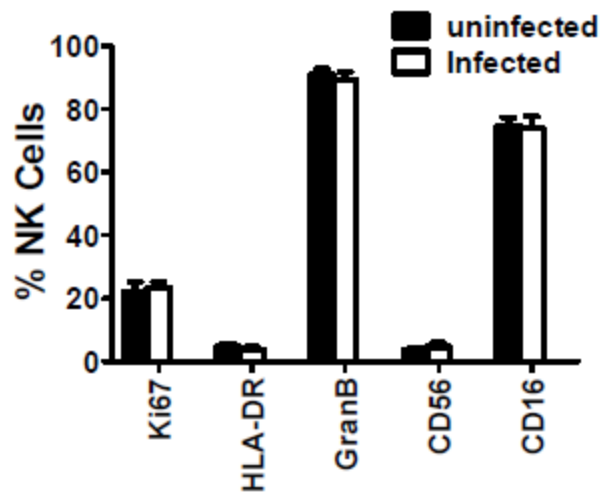

**Figure S4. Expression of maturation- and functional-associated molecules on NK cells.** The percentages of NK cells that express Ki67, HLA-DR, Granzyme B, CD56 and CD16 from the two experimental groups of monkeys are also shown. No statistically significant differences in the magnitudes of the cell subpopulations were noted as determined by the Mann-Whitney test.
