# Supplementary material
Source: PubMed Central journal article supplement (PMC3718279)
Supplement: NIHMS438330-supplement-Fig__S5.pdf [file NIHMS438330-supplement-Fig__S5.pdf]

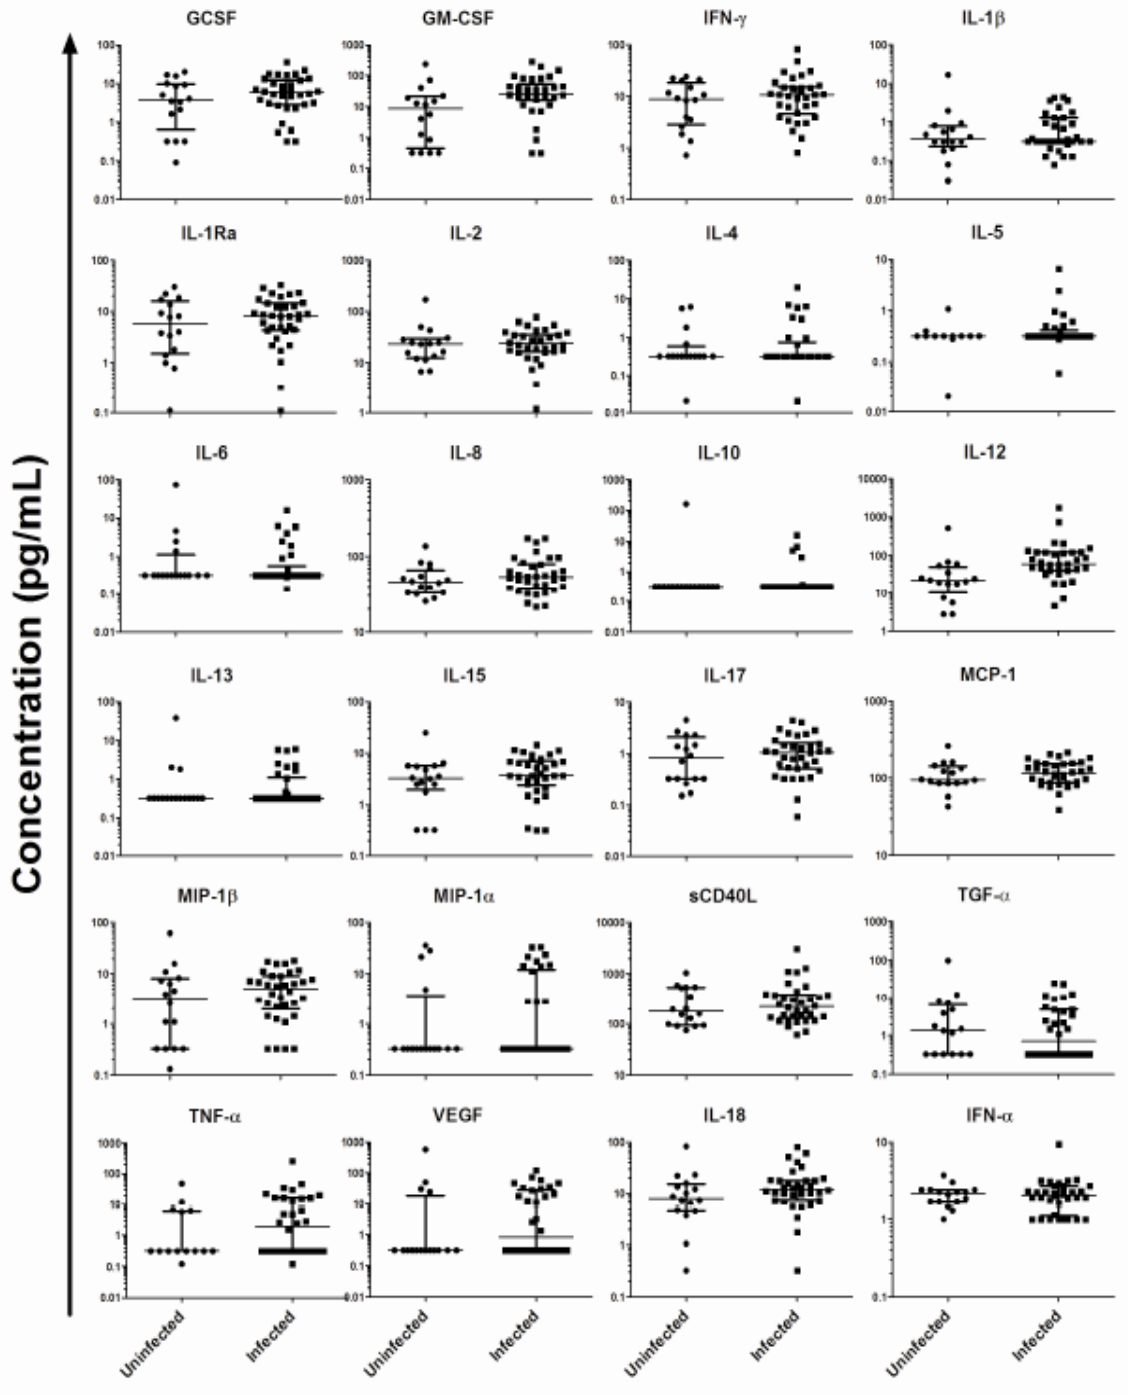

**Figure S5. Vaccine-induced cytokine responses.** To investigate systemic cytokine responses 4 weeks after rAd boost, twenty-three cytokines were measured by cytokine luminex and one cytokine (IFN- $\alpha$ ) was measured by ELISA in 50 vaccinated animals. The cytokine results for the infected (n=34) and uninfected groups (n=16) were compared. Statistical analysis for differences was done using ANOVA (Tukey HSD) and false discovery rate was adjusted from p-values by Bejamini-Hochberg controlling procedure. Although IL-12 and GM-CSF had a trend for higher levels in the infected groups, we found that there were no significant differences in cytokine expression between the vaccinated monkeys that became infected and the vaccinated monkeys that did not become infected. In these scatter-plots, median values with interquartile ranges are reported.
