# Supplementary material
Source: PubMed Central journal article supplement (PMC3718279)
Supplement: NIHMS438330-supplement-Fig__S6.pdf [file NIHMS438330-supplement-Fig__S6.pdf]

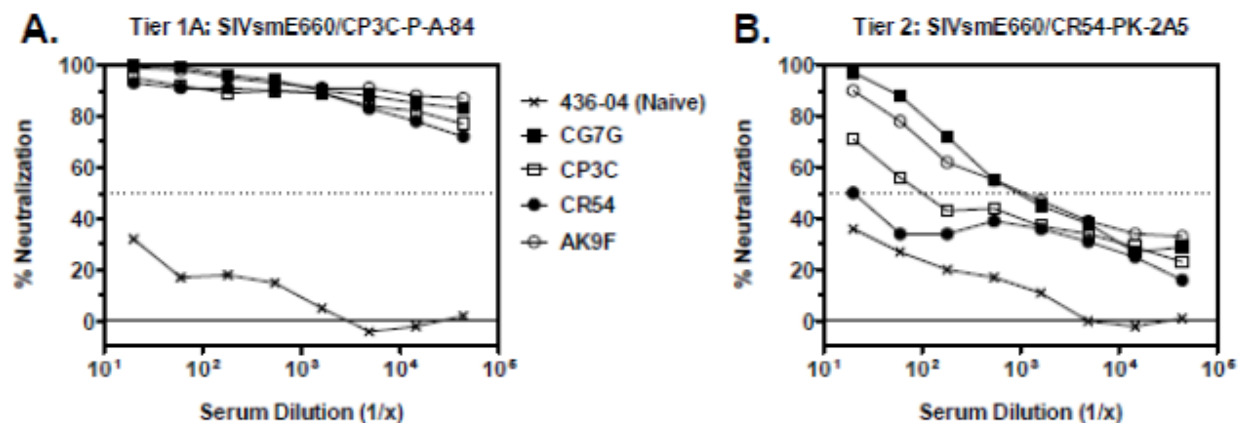

**Figure S6. Neutralization phenotype of SIVsmE660 Env pseudoviruses.** SIVsmE660 Env pseudotype clones CP3C-P-A-84 (A) and CR54-PK-2A5 (B) were assessed for sensitivity to antibody-mediated neutralization using serum obtained from four rhesus monkeys chronically infected with SIVsmE660 and a naïve control. Assays were performed using TZM.bl target cells. Data are presented as percent neutralization from serially diluted serum, with the hatched line indicating 50%.
