# Supplementary material
Source: PubMed Central journal article supplement (PMC3718279)
Supplement: NIHMS438330-supplement-Fig__S7.pdf [file NIHMS438330-supplement-Fig__S7.pdf]

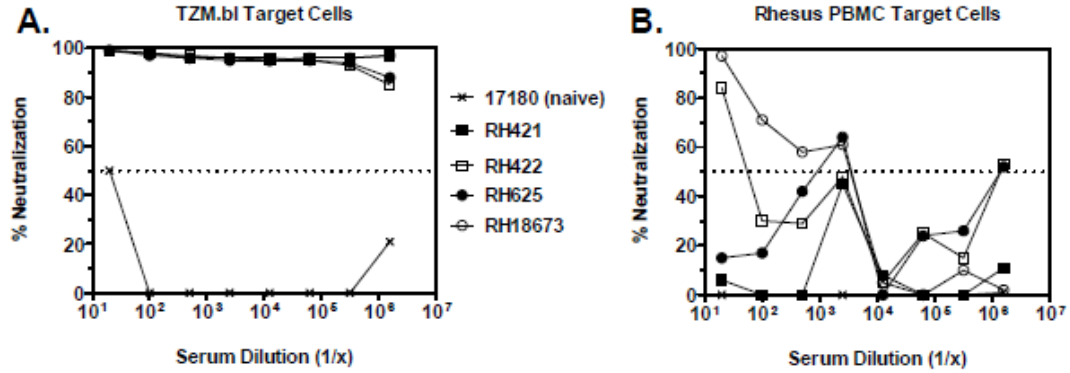

**Figure S7. Neutralization phenotype of SIVsmE660 challenge virus.** The SIVsmE660 challenge virus was assessed for sensitivity to antibody-mediated neutralization using serum obtained from four rhesus monkeys chronically infected with SIVsmE660 and a naïve control. Assays were performed using TZM.bl (A) or rhesus PBMC (B) target cells. Data are presented as percent neutralization from serially diluted serum, with the hatched line indicating 50%.
