# Supplementary material
Source: PubMed Central journal article supplement (PMC3718279)
Supplement: NIHMS438330-supplement-Table_S1.pdf [file NIHMS438330-supplement-Table_S1.pdf]

## Tables

Table S1. Plasma virus RNA levels in the cohorts of rhesus monkeys in the study.

| <b>SIVmac251 Challenge (<i>Mamu-A*01-</i>)</b> |           |               | <b>Viral Load (copies/mL)</b> |                  | <b>Viral Load (Log10)</b> |                  |
|------------------------------------------------|-----------|---------------|-------------------------------|------------------|---------------------------|------------------|
|                                                | <b>ID</b> | <b>Monkey</b> | <b>Peak</b>                   | <b>Set-point</b> | <b>Peak</b>               | <b>Set-point</b> |
| Control                                        | 1         | AR92          | 68955530                      | 285724171        | 7.84                      | 8.46             |
|                                                | 2         | AR33          | 176193602                     | 27597947         | 8.25                      | 7.44             |
|                                                | 3         | AR10          | 20903048                      | 191021           | 7.32                      | 5.28             |
|                                                | 4         | 2B2           | 141977351                     | 82897090         | 8.15                      | 7.92             |
|                                                | 5         | 1C8           | 25933889                      | 110842           | 7.41                      | 5.04             |
|                                                | 6         | 3C9           | 5489032                       | 138792           | 6.74                      | 5.14             |
|                                                | 7         | OC5           | 9934591                       | 22455505         | 7.00                      | 7.35             |
|                                                | 8         | BC38          | 5290881                       | 439466           | 6.72                      | 5.64             |
|                                                | 9         | BB69          | 81889171                      | 5246557          | 7.91                      | 6.72             |
|                                                | 10        | AP89          | 161107086                     | 43935764         | 8.21                      | 7.64             |
|                                                | 11        | AR27          | 55386949                      | 91378143         | 7.74                      | 7.96             |
|                                                | 12        | AP91          | 109525334                     | 10208470         | 8.04                      | 7.01             |
|                                                | 13        | AP31          | 37976419                      | 73910            | 7.58                      | 4.87             |
|                                                | 14        | AR65          | 9364500                       | 7971248          | 6.97                      | 6.90             |
|                                                | 15        | AO69          | 108211176                     | 1286211          | 8.03                      | 6.11             |
|                                                | 16        | 8B2           | 849442                        | 24781            | 5.93                      | 4.39             |
|                                                | 17        | AO46          | 14131228                      | 18504087         | 7.15                      | 7.27             |
|                                                | 18        | AP65          | 3938891                       | 350363           | 6.60                      | 5.54             |
|                                                | 19        | OA6           | 20151080                      | 126704128        | 7.30                      | 8.10             |
|                                                | 20        | AM64          | 12097333                      | 821286           | 7.08                      | 5.91             |
| Vaccine                                        | 1         | A500          | 4644560                       | 4046             | 6.67                      | 3.61             |
|                                                | 2         | AS33          | 6761481                       | 7746             | 6.83                      | 3.89             |
|                                                | 3         | AS15          | 31150907                      | 8629302          | 7.49                      | 6.94             |
|                                                | 4         | AR70          | 10112346                      | 2287152          | 7.00                      | 6.36             |
|                                                | 5         | A511          | 11750571                      | 214177           | 7.07                      | 5.33             |
|                                                | 6         | 9B0           | 8416298                       | 33140            | 6.93                      | 4.52             |
|                                                | 7         | 7B9           | 17195379                      | 320733           | 7.24                      | 5.51             |
|                                                | 8         | AOO7          | 6095311                       | 27806            | 6.78                      | 4.44             |
|                                                | 9         | BB80          | 2941557                       | 246390           | 6.47                      | 5.39             |
|                                                | 10        | BB75          | 3362521                       | 486021           | 6.53                      | 5.69             |
|                                                | 11        | BB61          | 58760207                      | 3810152          | 7.77                      | 6.58             |
|                                                | 12        | AR59          | 1503563                       | 4001             | 6.18                      | 3.60             |
|                                                | 13        | AR60          | 15364226                      | 3016912          | 7.19                      | 6.48             |
|                                                | 14        | AR01          | 12295626                      | 620687           | 7.09                      | 5.79             |
|                                                | 15        | AR36          | 1506026                       | 127489           | 6.18                      | 5.11             |
|                                                | 16        | AP57          | 3396018                       | 74057            | 6.53                      | 4.87             |
|                                                | 17        | AP08          | 9423467                       | 560205           | 6.97                      | 5.75             |

|    |      |         |        |      |      |
|----|------|---------|--------|------|------|
| 18 | AM74 | 603018  | 421541 | 5.78 | 5.62 |
| 19 | AR30 | 266384  | 75558  | 5.43 | 4.88 |
| 20 | AP03 | 4416040 | 712516 | 6.65 | 5.85 |

| <b>SIVsmE660 Challenge (<i>Mamu-A*01-</i>)</b> |           |               | <b>Viral Load (copies/mL)</b> |                  | <b>Viral Load (Log10)</b> |                  |
|------------------------------------------------|-----------|---------------|-------------------------------|------------------|---------------------------|------------------|
|                                                | <b>ID</b> | <b>Monkey</b> | <b>Peak</b>                   | <b>Set-point</b> | <b>Peak</b>               | <b>Set-point</b> |
| Control                                        | 1         | ZA40          | ND                            | ND               | ND                        | ND               |
|                                                | 2         | AX73          | 723104                        | 1084             | 5.86                      | 3.04             |
|                                                | 3         | ZB42          | 4,497,517                     | 5,652            | 6.65                      | 3.75             |
|                                                | 4         | A4V014        | 5,641,744                     | 442,157          | 6.75                      | 5.65             |
|                                                | 5         | A4V019        | 3,274,384                     | 47,026           | 6.52                      | 4.67             |
|                                                | 6         | BC30          | ND                            | ND               | ND                        | ND               |
|                                                | 7         | A5V045        | 22,674,172                    | 87,854           | 7.36                      | 4.94             |
|                                                | 8         | DC1K          | 3,223,461                     | 14,564           | 6.51                      | 4.16             |
|                                                | 9         | 05D215        | 1,864,111                     | 30,138           | 6.27                      | 4.48             |
|                                                | 10        | 05D247        | 464,751                       | 19,902           | 5.67                      | 4.30             |
|                                                | 11        | A5V005        | 104,118,967                   | 13,512,295       | 8.02                      | 7.13             |
|                                                | 12        | A5V020        | 13,461,636                    | 53,363           | 7.13                      | 4.73             |
|                                                | 13        | A5V026        | 25,605,885                    | 147,715          | 7.41                      | 5.17             |
|                                                | 14        | A5V041        | 108,014                       | ND               | 5.03                      | ND               |
|                                                | 15        | A5V043        | 14,348,213                    | 304,101          | 7.16                      | 5.48             |
|                                                | 16        | A5V052        | 594,240                       | ND               | 5.77                      | ND               |
|                                                | 17        | A6V029        | 35,643,280                    | Dead             | 7.55                      | Dead             |
|                                                | 18        | A6V034        | 10,258,314                    | 57,531           | 7.01                      | 4.76             |
|                                                | 19        | A6V035        | 3,364,178                     | 5550             | 6.53                      | 3.74             |
|                                                | 20        | A6V041        | 4,108,185                     | 80,483           | 6.61                      | 4.91             |
|                                                | 21        | A6V040        | ND                            | ND               | ND                        | ND               |
|                                                | 22        | A6V063        | 84,856,448                    | 2,691,872        | 7.93                      | 6.43             |
|                                                | 23        | A5V021        | 2,098,497                     | 95               | 6.32                      | 1.98             |
|                                                | 24        | A6V098        | 4,378,172                     | 1,877,101        | 6.64                      | 6.27             |
|                                                | 25        | A6V005        | 48,194,149                    | 262,246          | 7.68                      | 5.42             |
| Vaccine                                        | 1         | R26           | 326,340                       | ND               | 5.51                      | ND               |
|                                                | 2         | 00D338        | ND                            | ND               | ND                        | ND               |
|                                                | 3         | A4V013        | 16,848,072                    | 100,232          | 7.23                      | 5.00             |
|                                                | 4         | BB99          | 21906739                      | 1090             | 7.34                      | 3.04             |
|                                                | 5         | ZA74          | 9,077,689                     | 502              | 6.96                      | 2.70             |
|                                                | 6         | 04D089        | ND                            | ND               | ND                        | ND               |
|                                                | 7         | DC86          | ND                            | ND               | ND                        | ND               |
|                                                | 8         | DC82          | 10,421,684                    | 340,718          | 7.02                      | 5.53             |
|                                                | 9         | 05D218        | ND                            | ND               | ND                        | ND               |
|                                                | 10        | DC84          | 1,193,800                     | 29,857           | 6.08                      | 4.48             |
|                                                | 11        | X41           | ND                            | ND               | ND                        | ND               |

|    |        |            |         |      |      |
|----|--------|------------|---------|------|------|
| 12 | ZA16   | ND         | ND      | ND   | ND   |
| 13 | ZB08   | 29,198,711 | 53470   | 7.47 | 4.73 |
| 14 | A4V003 | 391,942    | 1257    | 5.59 | 3.10 |
| 15 | BB81   | ND         | ND      | ND   | ND   |
| 16 | BC26   | 2,870,733  | 277,639 | 6.46 | 5.44 |
| 17 | DC0X   | ND         | ND      | ND   | ND   |
| 18 | DC1M   | 733,110    | 385     | 5.87 | 2.59 |
| 19 | DC1J   | 3,372,913  | 29,904  | 6.53 | 4.48 |
| 20 | R05    | 142,111    | 159,058 | 5.15 | 5.20 |
| 21 | AY18   | ND         | ND      | ND   | ND   |
| 22 | ZB06   | ND         | ND      | ND   | ND   |
| 23 | BB40   | ND         | ND      | ND   | ND   |
| 24 | BB86   | ND         | ND      | ND   | ND   |
| 25 | BC28   | ND         | ND      | ND   | ND   |

ND: not detected

| <b>SIVsmE660 Challenge (<i>Mamu-A*01+</i>)</b> |    |        | Viral Load (copies/mL) |           | Viral Load (Log10) |           |
|------------------------------------------------|----|--------|------------------------|-----------|--------------------|-----------|
|                                                | ID | Monkey | Peak                   | Set-point | Peak               | Set-point |
| Control                                        | 1  | 4252   | 7,267,365              | 1,723     | 6.86               | 3.24      |
|                                                | 2  | ARB0   | 22,155,935             | 77,184    | 7.35               | 4.89      |
|                                                | 3  | AR94   | 5,493,679              | 12,240    | 6.74               | 4.09      |
|                                                | 4  | A027   | 63,422                 | 306       | 4.80               | 2.49      |
|                                                | 5  | AP54   | 173,257,661            | 482,199   | 8.24               | 5.68      |
|                                                | 6  | 2B6    | ND                     | ND        | ND                 | ND        |
|                                                | 7  | 1B5    | ND                     | ND        | ND                 | ND        |
|                                                | 8  | 8B1    | 41,301,033             | 83,546    | 7.62               | 4.92      |
|                                                | 9  | 9B3    | ND                     | ND        | ND                 | ND        |
|                                                | 10 | A6V036 | ND                     | ND        | ND                 | ND        |
|                                                | 11 | 4B4    | 45,693,601             | 87,205    | 7.66               | 4.94      |
|                                                | 12 | A6V031 | 17,992,686             | 35,367    | 7.26               | 4.55      |
|                                                | 13 | A523   | 381,155                | ND        | 5.58               | ND        |
|                                                | 14 | A547   | 76,148,764             | 365,735   | 7.88               | 5.56      |
|                                                | 15 | AR21   | 136,539                | 98        | 5.14               | 1.99      |
|                                                | 16 | AP37   | 44,829,720             | 1,726,363 | 7.65               | 6.24      |
|                                                | 17 | AP62   | 524,793                | 27,667    | 5.72               | 4.44      |
|                                                | 18 | AR02   | ND                     | ND        | ND                 | ND        |
|                                                | 19 | AP34   | 3,180,695              | 36,845    | 6.50               | 4.57      |
|                                                | 20 | ZD57   | 454,956                | 142       | 5.66               | 2.15      |
| Vaccine                                        | 1  | 4251   | ND                     | ND        | ND                 | ND        |
|                                                | 2  | AR81   | 40,128,589             | 807,173   | 7.60               | 5.91      |
|                                                | 3  | AR96   | 104,561                | 19        | 5.02               | 1.28      |
|                                                | 4  | 2C1    | ND                     | ND        | ND                 | ND        |

|    |        |         |        |      |      |
|----|--------|---------|--------|------|------|
| 5  | BC20   | ND      | ND     | ND   | ND   |
| 6  | A6V046 | ND      | ND     | ND   | ND   |
| 7  | A532   | 705,860 | 959    | 5.85 | 2.98 |
| 8  | AR56   | 195,590 | 223    | 5.29 | 2.35 |
| 9  | AP21   | ND      | ND     | ND   | ND   |
| 10 | AR44   | ND      | ND     | ND   | ND   |
| 11 | AR34   | 555,616 | 2,131  | 5.74 | 3.33 |
| 12 | AP32   | ND      | ND     | ND   | ND   |
| 13 | AR03   | ND      | ND     | ND   | ND   |
| 14 | AP77   | 116,581 | 20,081 | 5.07 | 4.30 |
| 15 | AR76   | ND      | ND     | ND   | ND   |
| 16 | AO18   | 288,458 | 394    | 5.46 | 2.60 |
| 17 | ZD46   | ND      | ND     | ND   | ND   |
| 18 | ZD51   | ND      | ND     | ND   | ND   |
| 19 | ZD12   | ND      | ND     | ND   | ND   |

---

ND: not detected
