# Supplementary material
Source: PubMed Central journal article supplement (PMC3718279)
Supplement: NIHMS438330-supplement-Table_S2.pdf [file NIHMS438330-supplement-Table_S2.pdf]

Table S2. *TRIM5* genotyping of the 129 rhesus monkeys in the study.

| A. SIVmac251 Challenge ( <i>Mamu-A*01-</i> ) |        |             |               | <i>TRIM5</i>                                  |               |         |                |
|----------------------------------------------|--------|-------------|---------------|-----------------------------------------------|---------------|---------|----------------|
| ID                                           | Monkey | MHC class I | Exon 8 (SPRY) |                                               |               |         |                |
|                                              |        |             | G997T/A       | Nucleotide deletion<br>(1015-1020:<br>ACGTTT) | TRIM5-<br>Cyp | Alleles |                |
| Control                                      | 1      | AR92        | A*01 -        | G/T                                           | 1             | N       | 1-5/6-11       |
|                                              | 2      | AR33        | A*01 -        | T/T                                           | 2             | N       | 6-11/6-11      |
|                                              | 3      | AR10        | A*01 -        | G/G                                           | 0             | N       | 1-5/1-5        |
|                                              | 4      | 2B2         | A*01 -        | G/T                                           | 1             | N       | 1-5/6-11       |
|                                              | 5      | 1C8         | A*01 -        | T/T                                           | 2             | N       | 6-11/6-11      |
|                                              | 6      | 3C9         | A*01 -        | G/G                                           | 0             | N       | 1-5/1-5        |
|                                              | 7      | OC5         | A*01 -        | T/A                                           | 2             | P       | 6-11/TRIM5-Cyp |
|                                              | 8      | BC38        | A*01 -        | G/G                                           | 0             | N       | 1-5/1-5        |
|                                              | 9      | BB69        | A*01 -        | G/T                                           | 1             | N       | 1-5/6-11       |
|                                              | 10     | AP89        | A*01 -        | G/T                                           | 1             | N       | 1-5/6-11       |
|                                              | 11     | AR27        | A*01 -        | G/T                                           | 1             | N       | 1-5/6-11       |
|                                              | 12     | AP91        | A*01 -        | G/T                                           | 1             | N       | 1-5/6-11       |
|                                              | 13     | AP31        | A*01 -        | G/A                                           | 1             | P       | 1-5/TRIM5-Cyp  |
|                                              | 14     | AR65        | A*01 -        | G/T                                           | 1             | N       | 1-5/6-11       |
|                                              | 15     | AO69        | A*01 -        | G/G                                           | 0             | N       | 1-5/1-5        |
|                                              | 16     | 8B2         | A*01 -        | G/T                                           | 1             | N       | 1-5/6-11       |
|                                              | 17     | AO46        | A*01 -        | G/A                                           | 1             | P       | 1-5/TRIM5-Cyp  |
|                                              | 18     | AP65        | A*01 -        | T/T                                           | 2             | N       | 6-11/6-11      |
|                                              | 19     | OA6         | A*01 -        | G/G                                           | 0             | N       | 1-5/1-5        |
|                                              | 20     | AM64        | A*01 -        | T/T                                           | 2             | N       | 6-11/6-11      |
| Vaccine                                      | 1      | A500        | A*01 -        | G/T                                           | 1             | N       | 1-5/6-11       |
|                                              | 2      | AS33        | A*01 -        | G/G                                           | 0             | N       | 1-5/1-5        |
|                                              | 3      | AS15        | A*01 -        | G/G                                           | 0             | N       | 1-5/1-5        |
|                                              | 4      | AR70        | A*01 -        | G/T                                           | 1             | N       | 1-5/6-11       |
|                                              | 5      | A511        | A*01 -        | T/A                                           | 2             | P       | 6-11/TRIM5-Cyp |
|                                              | 6      | 9B0         | A*01 -        | G/A                                           | 1             | P       | 1-5/TRIM5-Cyp  |
|                                              | 7      | 7B9         | A*01 -        | G/A                                           | 1             | P       | 1-5/TRIM5-Cyp  |
|                                              | 8      | AOO7        | A*01 -        | G/T                                           | 1             | N       | 1-5/6-11       |
|                                              | 9      | BB80        | A*01 -        | G/G                                           | 0             | N       | 1-5/1-5        |
|                                              | 10     | BB75        | A*01 -        | G/T                                           | 1             | N       | 1-5/6-11       |
|                                              | 11     | BB61        | A*01 -        | G/T                                           | 1             | N       | 1-5/6-11       |
|                                              | 12     | AR59        | A*01 -        | G/G                                           | 0             | N       | 1-5/1-5        |
|                                              | 13     | AR60        | A*01 -        | G/G                                           | 0             | N       | 1-5/1-5        |
|                                              | 14     | AR01        | A*01 -        | G/G                                           | 0             | N       | 1-5/1-5        |
|                                              | 15     | AR36        | A*01 -        | G/T                                           | 1             | N       | 1-5/6-11       |
|                                              | 16     | AP57        | A*01 -        | G/T                                           | 1             | N       | 1-5/6-11       |
|                                              | 17     | AP08        | A*01 -        | G/G                                           | 0             | N       | 1-5/1-5        |
|                                              | 18     | AM74        | A*01 -        | G/T                                           | 1             | N       | 1-5/6-11       |
|                                              | 19     | AR30        | A*01 -        | G/G                                           | 0             | N       | 1-5/1-5        |
|                                              | 20     | AP03        | A*01 -        | G/T                                           | 1             | N       | 1-5/6-11       |

| B. SIVsmE660 Challenge ( <i>Mamu-A*01-</i> ) |        |             |               | <i>TRIM5</i>                            |           |         |                     |
|----------------------------------------------|--------|-------------|---------------|-----------------------------------------|-----------|---------|---------------------|
| ID                                           | Monkey | MHC class I | Exon 8 (SPRY) |                                         |           |         |                     |
|                                              |        |             | G997T/A       | Nucleotide deletion (1015-1020: ACGTTT) | TRIM5-Cyp | Alleles |                     |
| Control                                      | 1      | ZA40        | A*01 -        | G/G                                     | 0         | N       | 1-5/1-5             |
|                                              | 2      | AX73        | A*01 -        | G/G                                     | 0         | N       | 1-5/1-5             |
|                                              | 3      | ZB42        | A*01 -        | G/G                                     | 0         | N       | 1-5/1-5             |
|                                              | 4      | A4V014      | A*01 -        | T/T                                     | 2         | N       | 6-11/6-11           |
|                                              | 5      | A4V019      | A*01 -        | A/A                                     | 2         | P       | TRIM5-Cyp/TRIM5-Cyp |
|                                              | 6      | BC30        | A*01 -        | G/A                                     | 1         | P       | 1-5/TRIM-Cyp        |
|                                              | 7      | A5V045      | A*01 -        | G/T                                     | 1         | N       | 1-5/6-11            |
|                                              | 8      | DC1K        | A*01 -        | G/T                                     | 1         | N       | 1-5/6-11            |
|                                              | 9      | 05D215      | A*01 -        | G/A                                     | 1         | P       | 1-5/TRIM5-Cyp       |
|                                              | 10     | 05D247      | A*01 -        | A/A                                     | 2         | P       | TRIM5-Cyp/TRIM5-Cyp |
|                                              | 11     | A5V005      | A*01 -        | T/T                                     | 2         | N       | 6-11/6-11           |
|                                              | 12     | A5V020      | A*01 -        | T/A                                     | 2         | P       | 6-11/TRIM5-Cyp      |
|                                              | 13     | A5V026      | A*01 -        | G/T                                     | 1         | N       | 1-5/6-11            |
|                                              | 14     | A5V041      | A*01 -        | G/G                                     | 0         | N       | 1-5/1-5             |
|                                              | 15     | A5V043      | A*01 -        | G/T                                     | 1         | N       | 1-5/6-11            |
|                                              | 16     | A5V052      | A*01 -        | T/A                                     | 2         | P       | 6-11/TRIM5-CyP      |
|                                              | 17     | A6V029      | A*01 -        | T/T                                     | 2         | N       | 6-11/6-11           |
|                                              | 18     | A6V034      | A*01 -        | T/T                                     | 2         | N       | 6-11/6-11           |
|                                              | 19     | A6V035      | A*01 -        | G/T                                     | 1         | N       | 1-5/6-11            |
|                                              | 20     | A6V041      | A*01 -        | G/G                                     | 0         | N       | 1-5/1-5             |
|                                              | 21     | A6V040      | A*01 -        | G/A                                     | 1         | P       | 1-5/TRIM5-Cyp       |
|                                              | 22     | A6V063      | A*01 -        | G/T                                     | 1         | N       | 1-5/6-11            |
|                                              | 23     | A5V021      | A*01 -        | G/T                                     | 1         | N       | 1-5/6-11            |
|                                              | 24     | A6V098      | A*01 -        | T/A                                     | 2         | P       | 6-11/TRIM5-Cyp      |
|                                              | 25     | A6V005      | A*01 -        | G/T                                     | 1         | N       | 1-5/6-11            |
| Vaccine                                      | 1      | R26         | A*01 -        | T/A                                     | 2         | P       | 6-11/TRIM5-Cyp      |
|                                              | 2      | 00D338      | A*01 -        | G/T                                     | 1         | N       | 1-5/6-11            |
|                                              | 3      | A4V013      | A*01 -        | G/T                                     | 1         | N       | 1-5/6-11            |
|                                              | 4      | BB99        | A*01 -        | G/T                                     | 1         | N       | 1-5/6-11            |
|                                              | 5      | ZA74        | A*01 -        | G/T                                     | 1         | N       | 1-5/6-11            |
|                                              | 6      | 04D089      | A*01 -        | G/T                                     | 1         | N       | 1-5/6-11            |
|                                              | 7      | DC86        | A*01 -        | G/T                                     | 1         | N       | 1-5/6-11            |
|                                              | 8      | DC82        | A*01 -        | G/T                                     | 1         | N       | 1-5/6-11            |
|                                              | 9      | 05D218      | A*01 -        | G/A                                     | 1         | P       | 1-5/TRIM5-Cyp       |
|                                              | 10     | DC84        | A*01 -        | G/T                                     | 1         | N       | 1-5/6-11            |
|                                              | 11     | X41         | A*01 -        | G/G                                     | 0         | N       | 1-5/1-5             |
|                                              | 12     | ZA16        | A*01 -        | G/T                                     | 1         | N       | 1-5/6-11            |
|                                              | 13     | ZB08        | A*01 -        | G/T                                     | 1         | N       | 1-5/6-11            |
|                                              | 14     | A4V003      | A*01 -        | G/T                                     | 1         | N       | 1-5/6-11            |
|                                              | 15     | BB81        | A*01 -        | G/G                                     | 0         | N       | 1-5/1-5             |
|                                              | 16     | BC26        | A*01 -        | G/T                                     | 1         | N       | 1-5/6-11            |
|                                              | 17     | DC0X        | A*01 -        | G/G                                     | 0         | N       | 1-5/1-5             |
|                                              | 18     | DC1M        | A*01 -        | G/G                                     | 0         | N       | 1-5/1-5             |

|    |      |        |     |   |   |           |
|----|------|--------|-----|---|---|-----------|
| 19 | DC1J | A*01 - | G/T | 1 | N | 1-5/6-11  |
| 20 | R05  | A*01 - | G/T | 1 | N | 1-5/6-11  |
| 21 | AY18 | A*01 - | G/T | 1 | N | 1-5/6-11  |
| 22 | ZB06 | A*01 - | G/G | 0 | N | 1-5/1-5   |
| 23 | BB40 | A*01 - | G/T | 1 | N | 1-5/6-11  |
| 24 | BB86 | A*01 - | T/T | 2 | N | 6-11/6-11 |
| 25 | BC28 | A*01 - | G/T | 1 | N | 1-5/6-11  |

---

| C. SIVsmE660 Challenge ( <i>Mamu-A*01+</i> ) |        |             |               | TRIM5                                   |           |         |                     |
|----------------------------------------------|--------|-------------|---------------|-----------------------------------------|-----------|---------|---------------------|
| ID                                           | Monkey | MHC class I | Exon 8 (SPRY) |                                         |           |         |                     |
|                                              |        |             | G997T/A       | Nucleotide deletion (1015-1020: ACGTTT) | TRIM5-Cyp | Alleles |                     |
| Control                                      | 1      | 4252        | A*01 +        | T/A                                     | 2         | P       | 6-11/TRIM5-Cyp      |
|                                              | 2      | ARB0        | A*01 +        | T/A                                     | 2         | P       | 6-11/TRIM5-Cyp      |
|                                              | 3      | AR94        | A*01 +        | G/G                                     | 0         | N       | 1-5/1-5             |
|                                              | 4      | A027        | A*01 +        | G/T                                     | 1         | N       | 1-5/6-11            |
|                                              | 5      | AP54        | A*01 +        | G/T                                     | 1         | N       | 1-5/6-11            |
|                                              | 6      | 2B6         | A*01 +        | G/A                                     | 1         | P       | 1-5/TRIM5-Cyp       |
|                                              | 7      | 1B5         | A*01 +        | G/G                                     | 0         | N       | 1-5/1-5             |
|                                              | 8      | 8B1         | A*01 +        | G/T                                     | 1         | N       | 1-5/6-11            |
|                                              | 9      | 9B3         | A*01 +        | G/T                                     | 1         | N       | 1-5/6-11            |
|                                              | 10     | A6V036      | A*01 +        | G/A                                     | 1         | P       | 1-5/TRIM5-Cyp       |
|                                              | 11     | 4B4         | A*01 +        | G/T                                     | 1         | N       | 1-5/6-11            |
|                                              | 12     | A6V031      | A*01 +        | G/G                                     | 0         | N       | 1-5/1-5             |
|                                              | 13     | A523        | A*01 +        | G/T                                     | 1         | N       | 1-5/6-11            |
|                                              | 14     | A547        | A*01 +        | G/T                                     | 1         | N       | 1-5/6-11            |
|                                              | 15     | AR21        | A*01 +        | G/A                                     | 1         | P       | 1-5/TRIM5-Cyp       |
|                                              | 16     | AP37        | A*01 +        | G/T                                     | 1         | N       | 1-5/6-11            |
|                                              | 17     | AP62        | A*01 +        | G/T                                     | 1         | N       | 1-5/6-11            |
|                                              | 18     | AR02        | A*01 +        | G/G                                     | 0         | N       | 1-5/1-5             |
|                                              | 19     | AP34        | A*01 +        | G/T                                     | 1         | N       | 1-5/6-11            |
|                                              | 20     | ZD57        | A*01 +        | G/G                                     | 0         | N       | 1-5/1-5             |
| Vaccine                                      | 1      | 4251        | A*01 +        | G/G                                     | 0         | N       | 1-5/1-5             |
|                                              | 2      | AR81        | A*01 +        | G/T                                     | 1         | N       | 1-5/6-11            |
|                                              | 3      | AR96        | A*01 +        | G/T                                     | 1         | N       | 1-5/6-11            |
|                                              | 4      | 2C1         | A*01 +        | G/A                                     | 1         | P       | 1-5/TRIM5-Cyp       |
|                                              | 5      | BC20        | A*01 +        | G/G                                     | 0         | N       | 1-5/1-5             |
|                                              | 6      | A6V046      | A*01 +        | G/A                                     | 1         | P       | 1-5/TRIM5-Cyp       |
|                                              | 7      | A532        | A*01 +        | G/T                                     | 1         | N       | 1-5/6-11            |
|                                              | 8      | AR56        | A*01 +        | A/A                                     | 2         | P       | TRIM5-Cyp/TRIM5-Cyp |
|                                              | 9      | AP21        | A*01 +        | G/G                                     | 0         | N       | 1-5/1-5             |
|                                              | 10     | AR44        | A*01 +        | G/A                                     | 1         | P       | 1-5/TRIM5-Cyp       |
|                                              | 11     | AR34        | A*01 +        | G/T                                     | 1         | N       | 1-5/6-11            |
|                                              | 12     | AP32        | A*01 +        | G/T                                     | 1         | N       | 1-5/6-11            |
|                                              | 13     | AR03        | A*01 +        | G/G                                     | 0         | N       | 1-5/1-5             |
|                                              | 14     | AP77        | A*01 +        | G/T                                     | 1         | N       | 1-5/6-11            |
|                                              | 15     | AR76        | A*01 +        | G/T                                     | 1         | N       | 1-5/6-11            |
|                                              | 16     | A018        | A*01 +        | G/T                                     | 1         | N       | 1-5/6-11            |
|                                              | 17     | ZD46        | A*01 +        | G/T                                     | 1         | N       | 1-5/6-11            |
|                                              | 18     | ZD51        | A*01 +        | G/G                                     | 0         | N       | 1-5/1-5             |
|                                              | 19     | ZD12        | A*01 +        | G/G                                     | 0         | N       | 1-5/1-5             |
