# Supplementary material
Source: PubMed Central journal article supplement (PMC3718279)
Supplement: NIHMS438330-supplement-Table_S3.pdf [file NIHMS438330-supplement-Table_S3.pdf]

Table S3. The distribution of *TRIM5* alleles in the cohorts of rhesus monkeys in the study.

| A. SIVmac251 Challenge ( <i>Mamu-A*01-</i> ) |             | <i>TRIM5</i> alleles | n | %  |
|----------------------------------------------|-------------|----------------------|---|----|
| Control                                      | Restrictive | 1-5/1-5              | 5 | 25 |
|                                              |             | 1-5/TRIM5-Cyp        | 2 | 10 |
|                                              | Permissive  | 1-5/6-11             | 8 | 40 |
|                                              |             | 6-11/6-11            | 4 | 20 |
|                                              |             | 6-11/TRIM5-Cyp       | 1 | 5  |
| Vaccine                                      | Restrictive | 1-5/1-5              | 8 | 40 |
|                                              |             | 1-5/TRIM5-Cyp        | 2 | 10 |
|                                              | Permissive  | 1-5/6-11             | 9 | 45 |
|                                              |             | 6-11/6-11            | 0 | 0  |
|                                              |             | 6-11/TRIM5-Cyp       | 1 | 5  |

| B. SIVsmE660 Challenge ( <i>Mamu-A*01-</i> ) |             | <i>TRIM5</i> alleles | n  | %  |
|----------------------------------------------|-------------|----------------------|----|----|
| Control                                      | Restrictive | 1-5/1-5              | 5  | 20 |
|                                              |             | 1-5/TRIM5-Cyp        | 3  | 12 |
|                                              | Permissive  | 1-5/6-11             | 8  | 32 |
|                                              |             | 6-11/6-11            | 4  | 16 |
|                                              |             | 6-11/TRIM5-Cyp       | 3  | 12 |
| Vaccine                                      | Restrictive | 1-5/1-5              | 5  | 20 |
|                                              |             | 1-5/TRIM5-Cyp        | 1  | 4  |
|                                              | Permissive  | 1-5/6-11             | 17 | 68 |
|                                              |             | 6-11/6-11            | 1  | 4  |
|                                              |             | 6-11/TRIM5-Cyp       | 1  | 4  |

Two TRIM5-Cyp/TRIM5-Cyp homozygous monkeys identified in the control group were excluded from the analysis.

| C. SIVsmE660 Challenge ( <i>Mamu-A*01+</i> ) |                    | <i>TRIM5</i> alleles | n  | %  |
|----------------------------------------------|--------------------|----------------------|----|----|
| Control                                      | <b>Restrictive</b> | 1-5/1-5              | 5  | 25 |
|                                              |                    | 1-5/TRIM5-Cyp        | 3  | 15 |
|                                              | Permissive         | 1-5/6-11             | 10 | 50 |
|                                              |                    | 6-11/6-11            | 0  | 0  |
|                                              |                    | 6-11/TRIM5-Cyp       | 2  | 10 |
| Vaccine                                      | Restrictive        | 1-5/1-5              | 6  | 32 |
|                                              |                    | 1-5/TRIM5-Cyp        | 3  | 16 |
|                                              | Permissive         | 1-5/6-11             | 9  | 47 |
|                                              |                    | 6-11/6-11            | 0  | 0  |
|                                              |                    | 6-11/TRIM5-Cyp       | 0  | 0  |

One TRIM5-Cyp/TRIM5-Cyp homozygous monkey identified in the vaccine group was excluded from the analysis.
